# Supplementary material for: Structure and bonding of molecular stirrers with formula B7M2− and B8M2 (M = Zn, Cd, Hg)
Source: Royal Society of Chemistry journal article supplement (doi:10.1039/d0cp01603a), 2020-01-01
Supplement: d0cp01603a3.pdf [file d0cp01603a3.pdf]

# Supporting Information

## Structure and Bonding of Molecular Stirrers with formula $B_7M_2^-$ and $B_8M_2$ (M=Zn, Cd, Hg)

Rui Yu,<sup>a</sup> Jorge Barroso,<sup>b</sup> Meng-hui Wang,<sup>a</sup> Wei-yan Liang,<sup>a</sup> Chen Chen,<sup>a</sup> Ximena  
Zarate,<sup>d</sup> Mesías Orozco-Ic,<sup>b</sup> Zhong-hua Cui,<sup>\*,ac</sup> and Gabriel Merino.<sup>\*,b</sup>

<sup>a</sup>*Institute of Atomic and Molecular Physics, Jilin University, Changchun 130023,  
People's Republic of China; Beijing National Laboratory for Molecular Sciences*

<sup>b</sup>*Departamento de Física Aplicada, Centro de Investigación y de Estudios Avanzados,  
Unidad Mérida*

<sup>c</sup>*Beijing National Laboratory for Molecular Sciences*

<sup>d</sup>*Instituto de Ciencias Químicas Aplicadas, Theoretical and Computational Chemistry  
Center, Facultad de Ingeniería, Universidad Autónoma de Chile, Av. Pedro de  
Valdivia 425, Santiago, Chile*

*E-mail: zcui@jlu.edu.cn*

*E-mail: gmerino@cinvestav.mx*

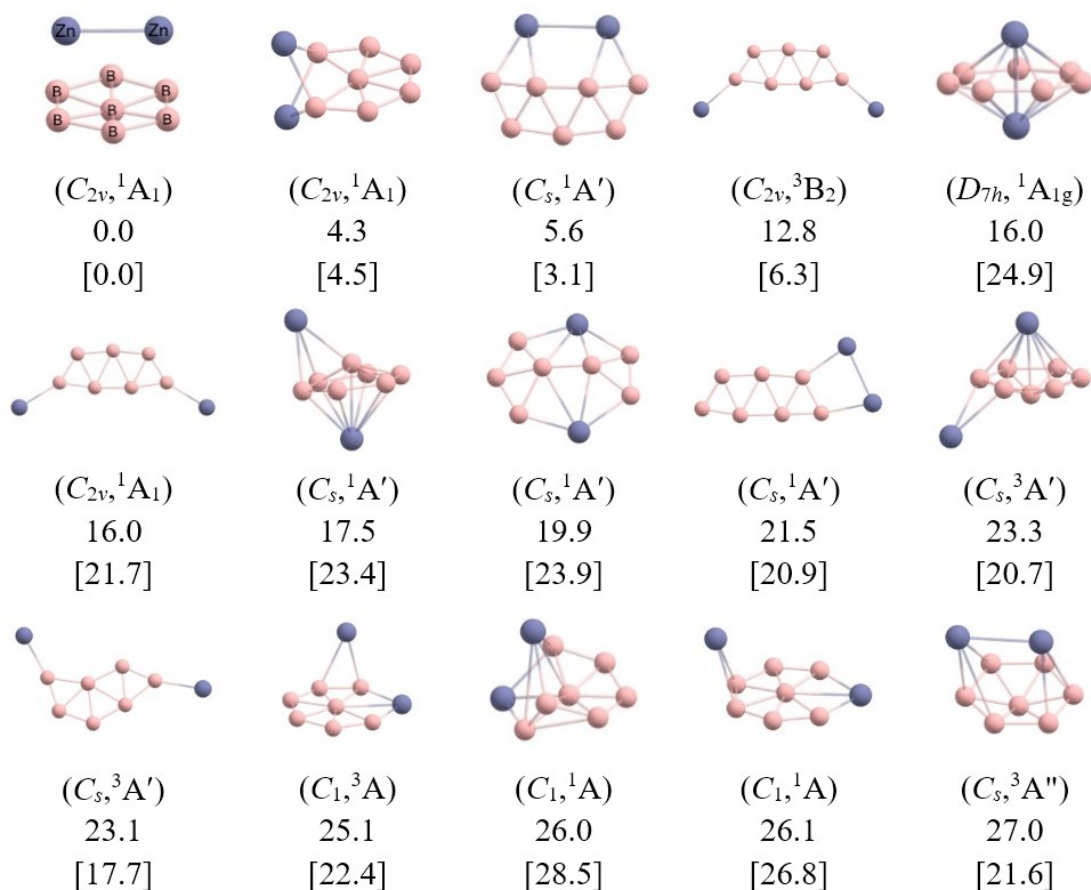

**Figure S1.** PBE0/def2-TZVP structures of  $B_7Zn_2^-$ . Relative energy in  $\text{kcal}\cdot\text{mol}^{-1}$  were computed at the CCSD(T)/def2-TZVP//PBE0/def2-TZVP level, including the ZPE correction at the PBE0/def2-TZVP level. The relative energy computed at the PBE0/def2-TZVP is given in square brackets. The point group and spectroscopic states are given in parentheses.

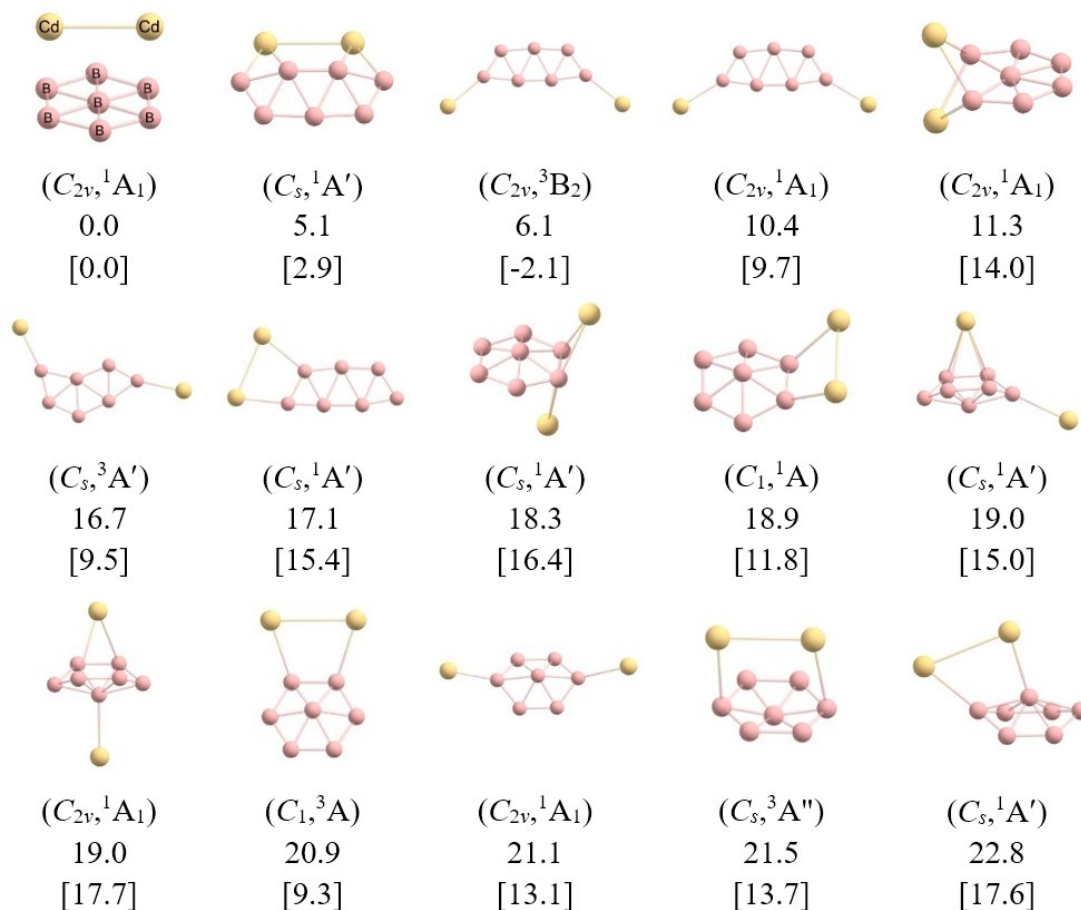

**Figure S2.** PBE0/def2-TZVP structures of B<sub>7</sub>Cd<sub>2</sub><sup>-</sup>. Relative energy in kcal·mol<sup>-1</sup> were computed at the CCSD(T)/def2-TZVP//PBE0/def2-TZVP level, including the ZPE correction at the PBE0/def2-TZVP level. The relative energy computed at the PBE0/def2-TZVP is given in square brackets. The point group and spectroscopic states are given in parentheses.

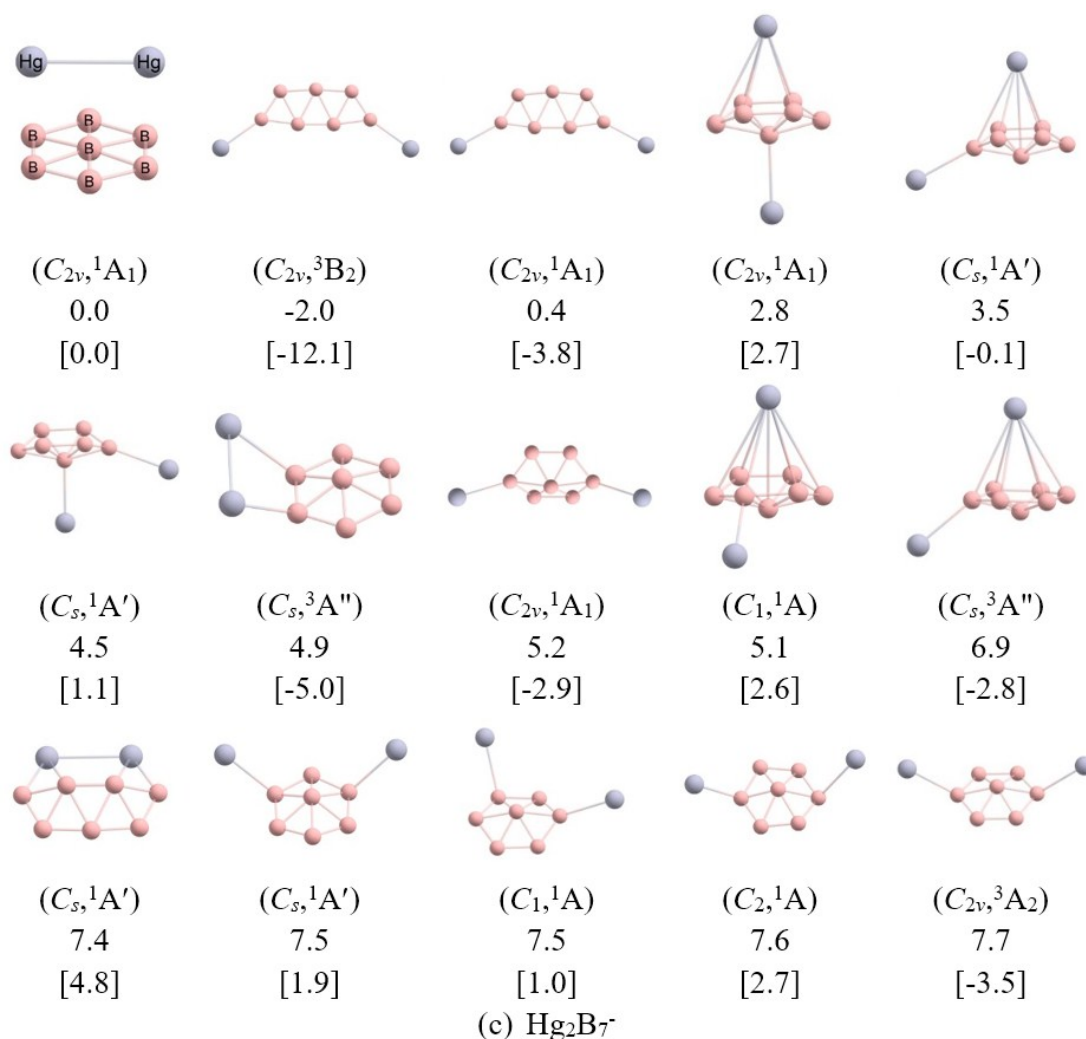

**Figure S3.** PBE0/def2-TZVP structures of  $B_7Hg_2^-$ . Relative energy in  $\text{kcal}\cdot\text{mol}^{-1}$  were computed at the CCSD(T)/def2-TZVP//PBE0/def2-TZVP level, including the ZPE correction at the PBE0/def2-TZVP level. The relative energy computed at the PBE0/def2-TZVP is given in square brackets. The point group and spectroscopic states are given in parentheses.

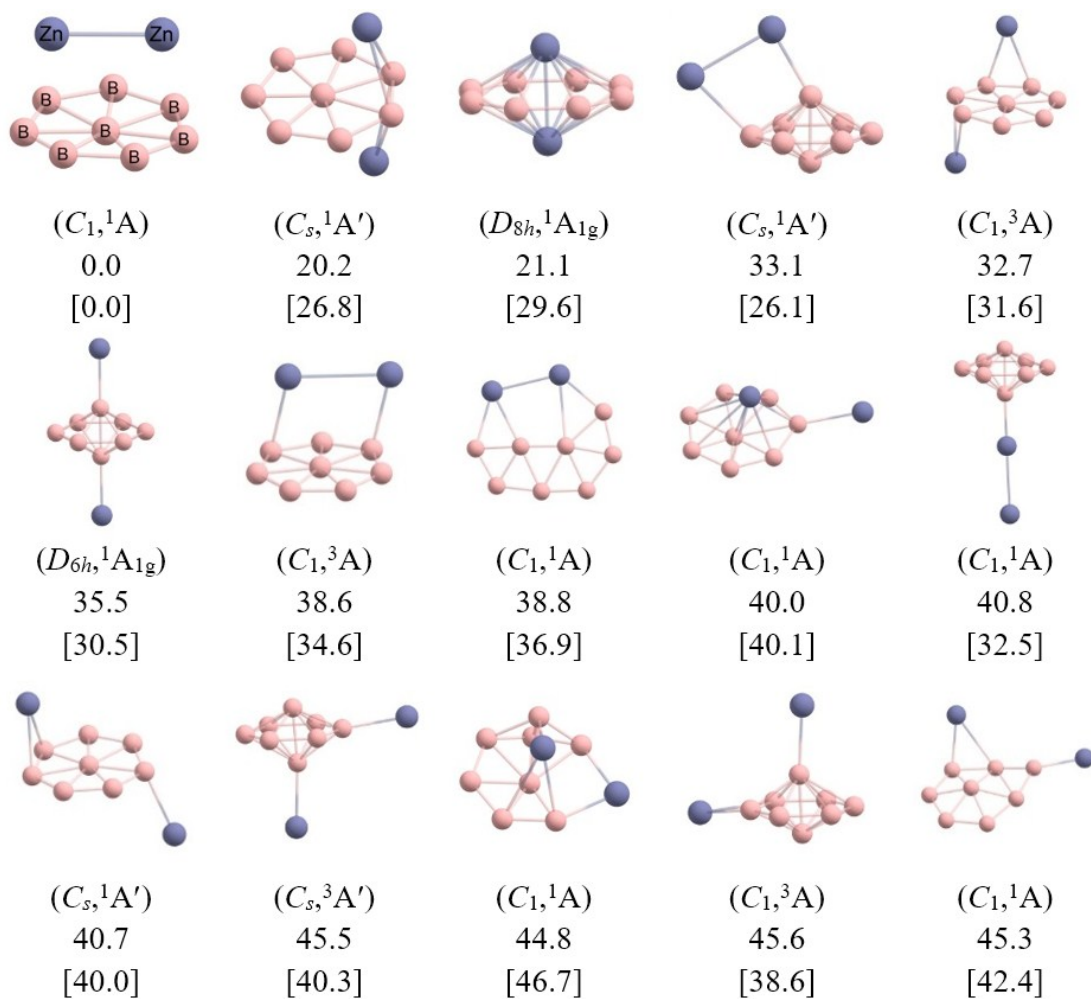

**Figure S4.** PBE0/def2-TZVP structures of  $B_8Zn_2$ . Relative energy in  $\text{kcal}\cdot\text{mol}^{-1}$  were computed at the CCSD(T)/def2-TZVP//PBE0/def2-TZVP level, including the ZPE correction at the PBE0/def2-TZVP level. The relative energy computed at the PBE0/def2-TZVP is given in square brackets. The point group and spectroscopic states are given in parentheses.

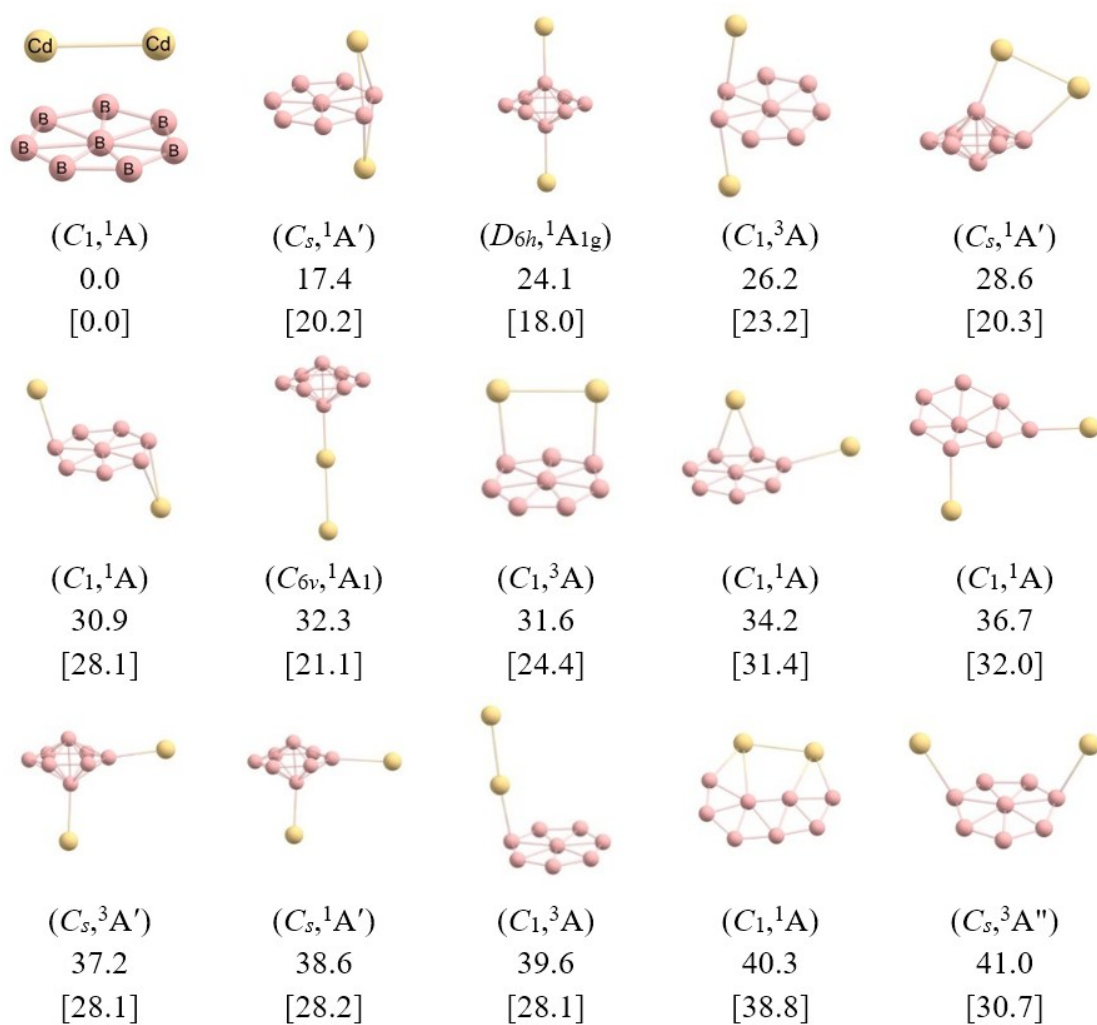

**Figure S5.** PBE0/def2-TZVP structures of  $B_8Cd_2$ . Relative energy in  $\text{kcal}\cdot\text{mol}^{-1}$  were computed at the CCSD(T)/def2-TZVP//PBE0/def2-TZVP level, including the ZPE correction at the PBE0/def2-TZVP level. The relative energy computed at the PBE0/def2-TZVP is given in square brackets. The point group and spectroscopic states are given in parentheses.

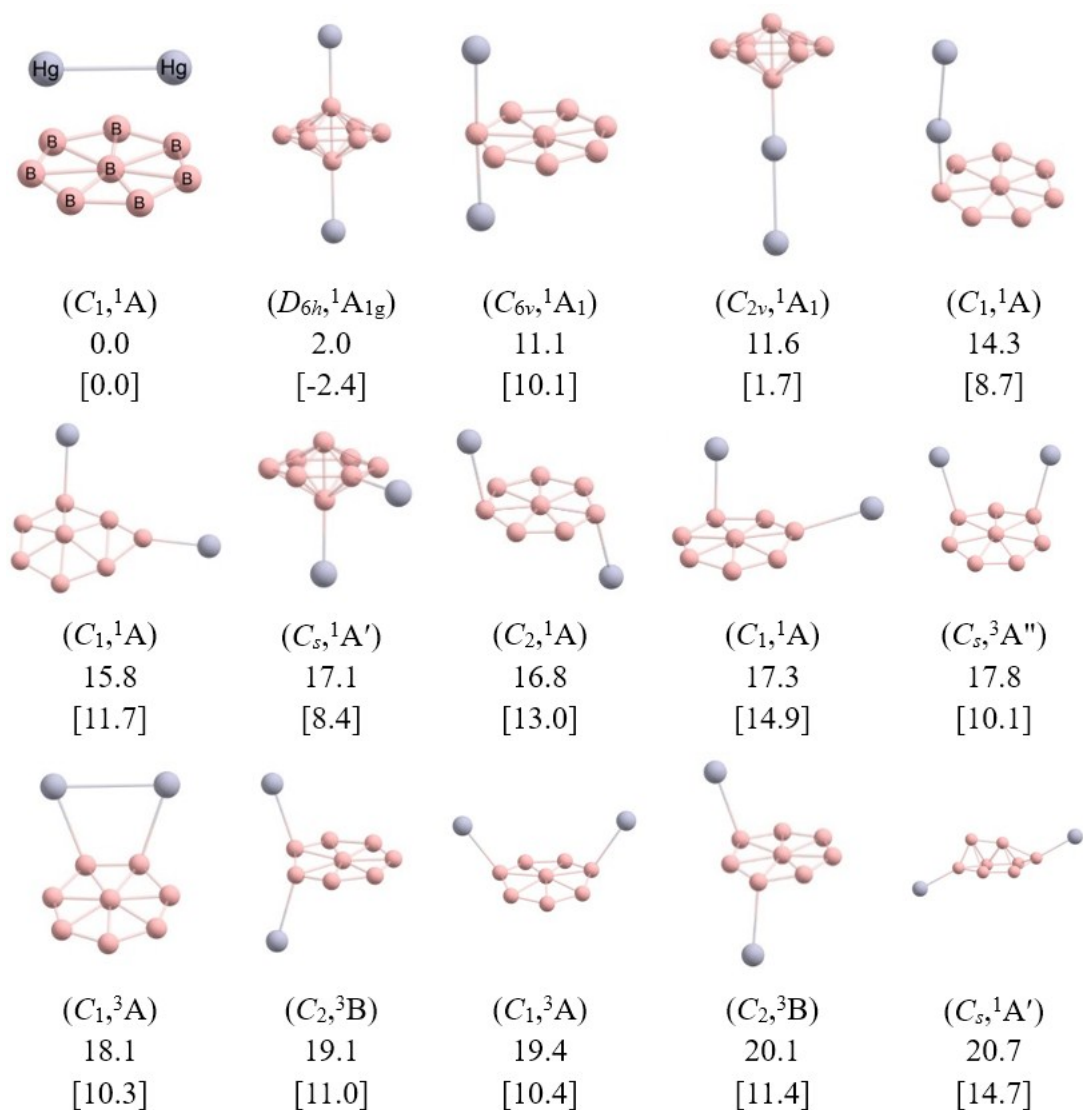

**Figure S6.** PBE0/def2-TZVP structures of  $B_8Hg_2$ . Relative energy in  $\text{kcal}\cdot\text{mol}^{-1}$  were computed at the CCSD(T)/def2-TZVP//PBE0/def2-TZVP level, including the ZPE correction at the PBE0/def2-TZVP level. The relative energy computed at the PBE0/def2-TZVP is given in square brackets. The point group and spectroscopic states are given in parentheses.

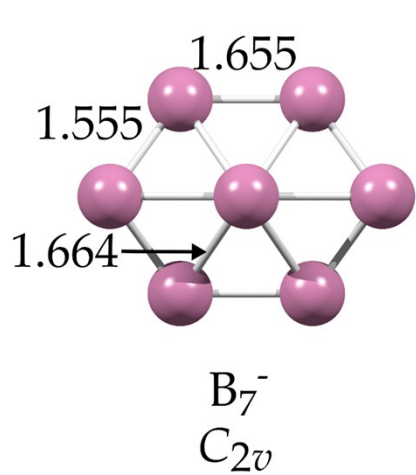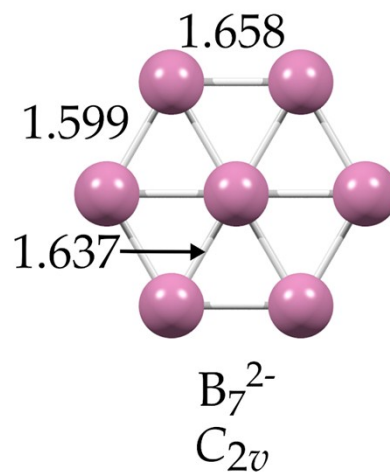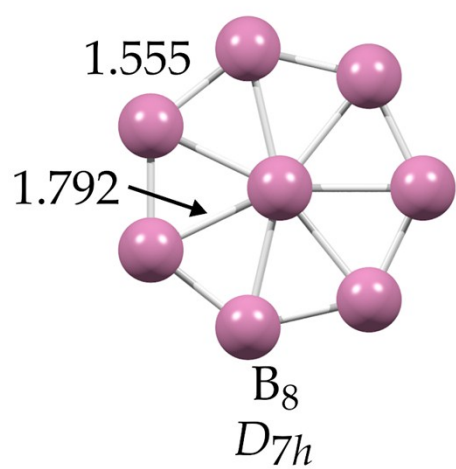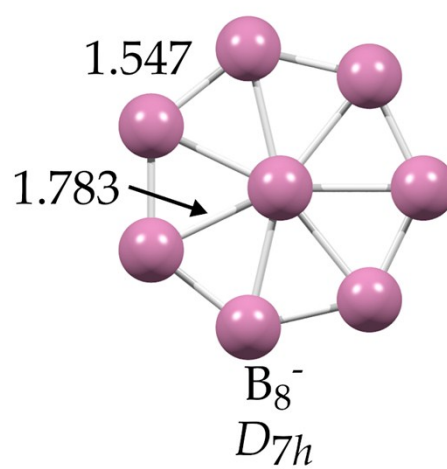

**Figure S7.** PBE0/def2-TZVP structures for the putative global minimum of  $B_7^{-/2-}$  and  $B_8^{0/-}$ .



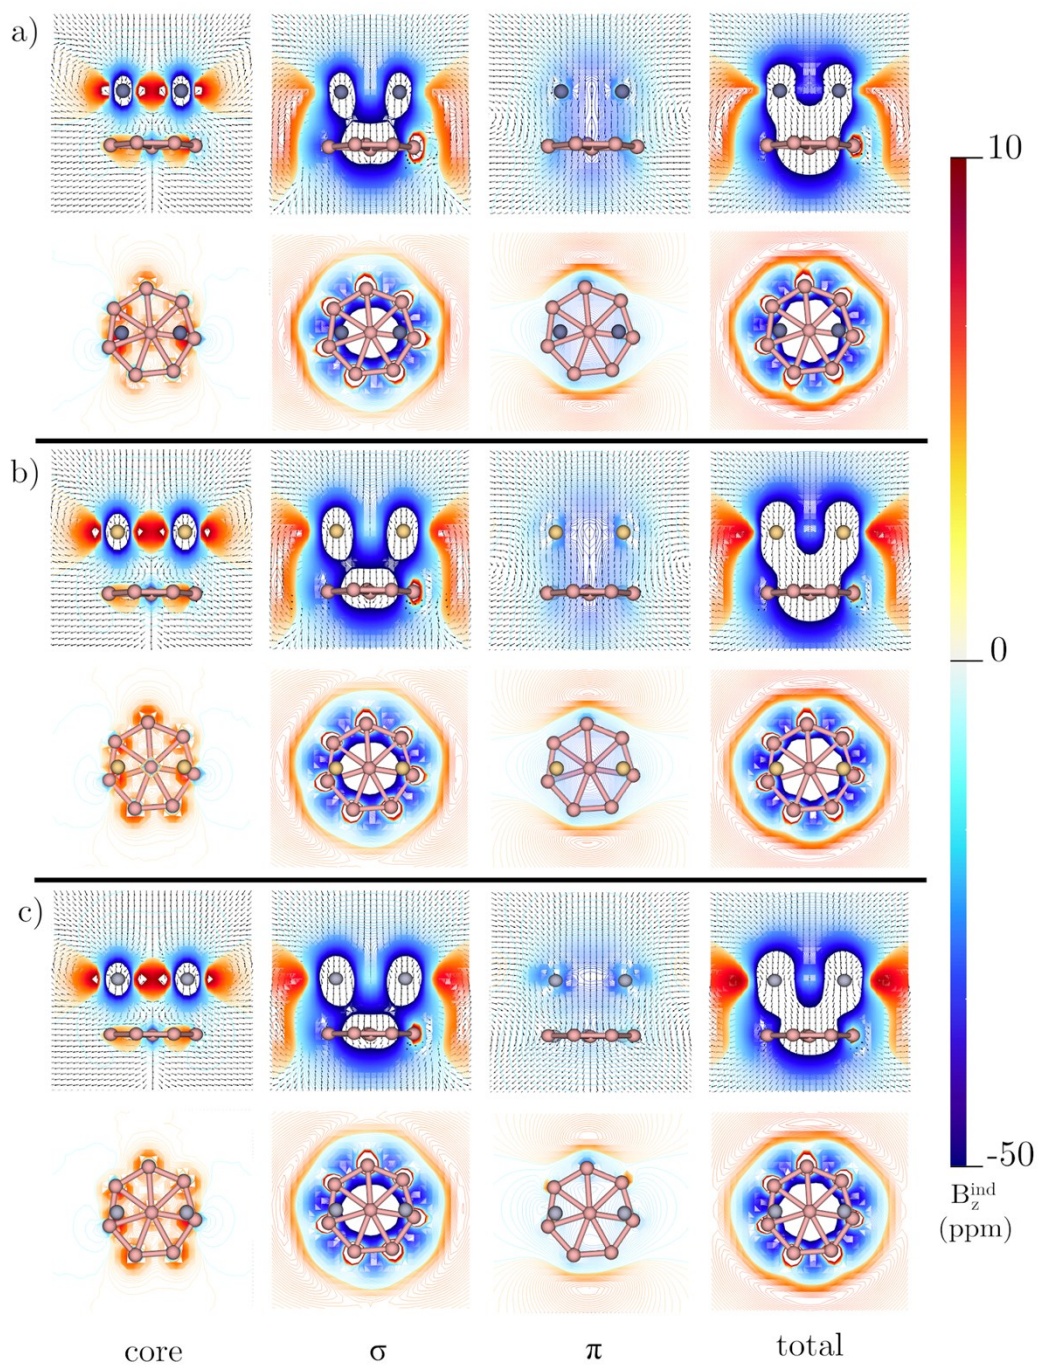

**Figure S8.**  $\mathbf{B}^{\text{ind}}$  vector plots dissected into its orbital contributions for  $\text{M}_2\text{B}_7^-$  ( $\text{M} = \text{Zn}, \text{Cd}, \text{Hg}$ ) at the PBE0/def2-TZVP level. The arrows point in the direction of  $\mathbf{B}^{\text{ind}}$ , while the color contours its  $z$ -component.

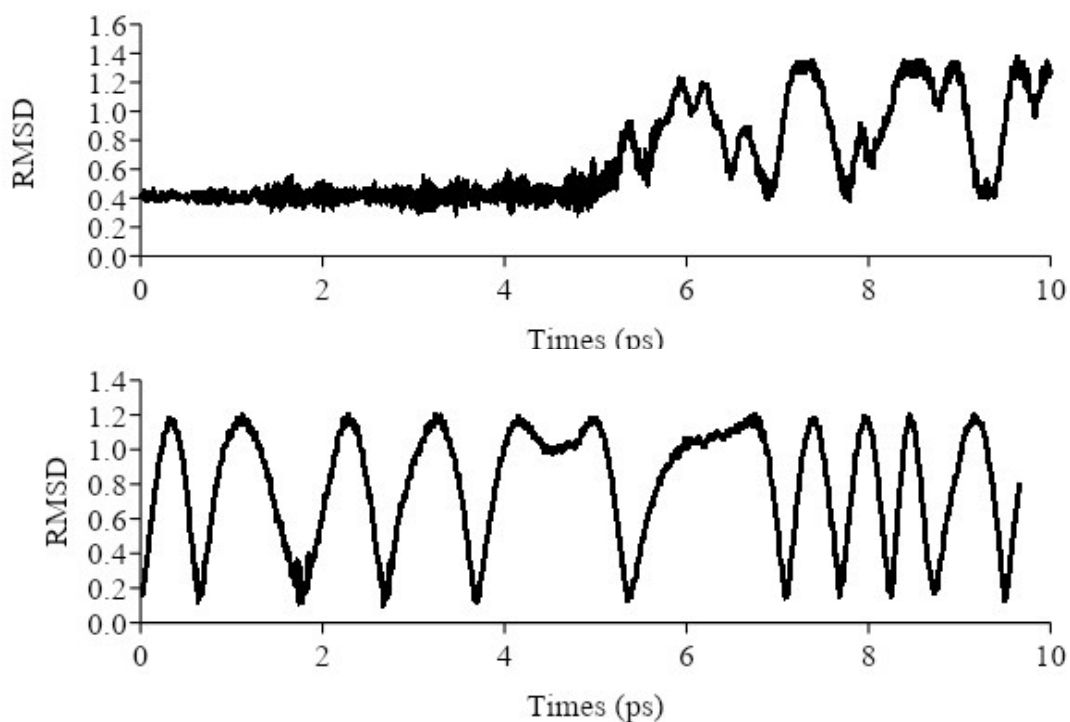

**Figure S9.** The RMSD versus time of the BOMDs simulations of  $\text{Cd}_2\text{B}_7^-$  (top) and  $\text{Cd}_2\text{B}_8$  (bottom) computed at 373 K and at the PBE0/def2-SVP level.

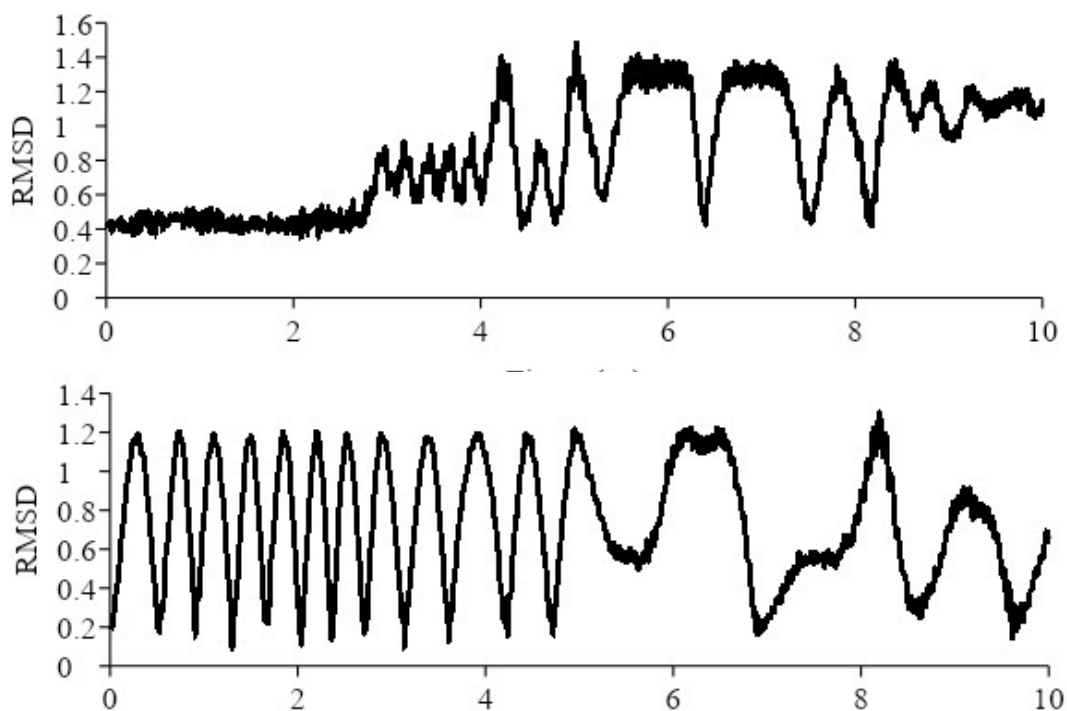

**Figure S10.** The RMSD versus time of the BOMDs simulations of  $\text{Cd}_2\text{B}_7^-$  (top) and  $\text{Cd}_2\text{B}_8$  (bottom) computed at 573 K and at the PBE0/def2-SVP level.

**Table S1.** The NPA charge,  $q$ , of the  $\text{M}_2$  fragment in  $|e|$ , the distances corresponding to

M-M, and the one from the metallic dimer to the boron framework in (M-B) Å, Wiberg bond index (WBI), and HOMO-LUMO energy gap ( $\Delta_{\text{H-L}}$ , eV) of the putative global minima of the  $\text{B}_7\text{M}_2^-$  and  $\text{B}_8\text{M}_2$  (M=Zn, Cd, Hg) combinations computed at the PBE0/def2-TZVP level.

|                           | $q_{\text{M-M}}$ | M-M   | M-B   | $\text{WBI}_{\text{M-M}}$ | $\Delta_{\text{H-L}}$ |
|---------------------------|------------------|-------|-------|---------------------------|-----------------------|
| $\text{Zn}_2\text{B}_7^-$ | 0.84             | 2.376 | 2.272 | 0.76                      | 0.11                  |
| $\text{Cd}_2\text{B}_7^-$ | 0.72             | 2.753 | 2.382 | 0.62                      | 0.12                  |
| $\text{Hg}_2\text{B}_7^-$ | 0.42             | 2.913 | 2.416 | 0.39                      | 0.11                  |
| $\text{Zn}_2\text{B}_8$   | 1.12             | 2.371 | 2.295 | 0.77                      | 0.14                  |
| $\text{Cd}_2\text{B}_8$   | 1.12             | 2.711 | 2.473 | 0.67                      | 0.15                  |
| $\text{Hg}_2\text{B}_8$   | 0.84             | 2.817 | 2.523 | 0.45                      | 0.13                  |

**Table S2.** Radial and peripheral B-B, and  $\text{M}_2$  lengths of the  $\text{B}_7\text{M}_2^-$  and  $\text{B}_8\text{M}_2$  (M=Zn, Cd, Hg) clusters at the PBE0/def2-TZVP level.

|                          |              | Zn    | Cd    | Hg    |
|--------------------------|--------------|-------|-------|-------|
| $\text{B}_7\text{M}_2^-$ | radial       | 1.635 | 1.630 | 1.634 |
|                          | peripheral   | 1.611 | 1.607 | 1.596 |
|                          | $\text{M}_2$ | 2.376 | 2.754 | 2.912 |
| $\text{B}_8\text{M}_2$   | radial       | 1.784 | 1.799 | 1.808 |
|                          | peripheral   | 1.544 | 1.550 | 1.533 |
|                          | $\text{M}_2$ | 2.372 | 2.711 | 2.817 |

### Cartesian coordinates

B<sub>7</sub>Zn<sub>2</sub><sup>-</sup> 0.0 kcal·mol<sup>-1</sup>

|    |              |              |              |
|----|--------------|--------------|--------------|
| B  | 0.000000000  | 0.000000000  | 1.483824000  |
| B  | 0.000000000  | 1.623898000  | 1.297300000  |
| B  | 1.399375000  | 0.827423000  | 1.345821000  |
| B  | 1.399375000  | -0.827423000 | 1.345821000  |
| B  | 0.000000000  | -1.623898000 | 1.297300000  |
| B  | -1.399375000 | -0.827423000 | 1.345821000  |
| B  | -1.399375000 | 0.827423000  | 1.345821000  |
| Zn | -1.187954000 | 0.000000000  | -0.788476000 |
| Zn | 1.187954000  | 0.000000000  | -0.788476000 |

B<sub>7</sub>Zn<sub>2</sub><sup>-</sup> 4.3 kcal·mol<sup>-1</sup>

|    |              |              |              |
|----|--------------|--------------|--------------|
| B  | -0.773189000 | 0.000000000  | 2.798324000  |
| B  | -1.483746000 | 0.000000000  | 0.058502000  |
| B  | -1.737602000 | 0.000000000  | 1.579561000  |
| B  | 0.000000000  | 0.000000000  | 1.266397000  |
| B  | 0.773189000  | 0.000000000  | 2.798324000  |
| B  | 1.483746000  | 0.000000000  | 0.058502000  |
| B  | 1.737602000  | 0.000000000  | 1.579561000  |
| Zn | 0.000000000  | 1.262732000  | -0.846150000 |
| Zn | 0.000000000  | -1.262732000 | -0.846150000 |

B<sub>7</sub>Zn<sub>2</sub><sup>-</sup> 5.6 kcal·mol<sup>-1</sup>

|    |              |              |              |
|----|--------------|--------------|--------------|
| B  | 2.256613000  | 0.886897000  | -0.036881000 |
| B  | -1.598066000 | 2.259957000  | -0.328466000 |
| B  | 0.801481000  | 1.239818000  | 0.678878000  |
| B  | 0.005946000  | 2.510943000  | -0.210801000 |
| B  | -0.795156000 | 1.243168000  | 0.678816000  |
| B  | 1.608843000  | 2.252797000  | -0.328561000 |
| B  | -2.252101000 | 0.897101000  | -0.036592000 |
| Zn | 1.247020000  | -0.943551000 | -0.034668000 |
| Zn | -1.251613000 | -0.938229000 | -0.034730000 |

B<sub>7</sub>Zn<sub>2</sub><sup>-</sup> 12.8 kcal·mol<sup>-1</sup>

|    |             |              |              |
|----|-------------|--------------|--------------|
| B  | 0.000000000 | -2.440903000 | 0.683123000  |
| B  | 0.000000000 | 1.591521000  | 1.946154000  |
| B  | 0.000000000 | -0.800308000 | 0.474152000  |
| B  | 0.000000000 | 0.000000000  | 2.049429000  |
| B  | 0.000000000 | 0.800308000  | 0.474152000  |
| B  | 0.000000000 | -1.591521000 | 1.946154000  |
| B  | 0.000000000 | 2.440903000  | 0.683123000  |
| Zn | 0.000000000 | -3.998841000 | -0.688008000 |
| Zn | 0.000000000 | 3.998841000  | -0.688008000 |

B<sub>7</sub>Zn<sub>2</sub><sup>-</sup> 16.0 kcal·mol<sup>-1</sup>

|   |              |              |             |
|---|--------------|--------------|-------------|
| B | 0.000000000  | 1.845490000  | 0.000000000 |
| B | -0.800728000 | -1.662729000 | 0.000000000 |
| B | -1.799220000 | -0.410660000 | 0.000000000 |
| B | 1.799220000  | -0.410660000 | 0.000000000 |
| B | 0.800728000  | -1.662729000 | 0.000000000 |

|    |              |             |              |
|----|--------------|-------------|--------------|
| B  | -1.442862000 | 1.150644000 | 0.000000000  |
| B  | 1.442862000  | 1.150644000 | 0.000000000  |
| Zn | 0.000000000  | 0.000000000 | -1.246479000 |
| Zn | 0.000000000  | 0.000000000 | 1.246479000  |

B<sub>7</sub>Cd<sub>2</sub><sup>-</sup> 0.0 kcal·mol<sup>-1</sup>

|    |              |              |              |
|----|--------------|--------------|--------------|
| B  | 0.000000000  | 0.000000000  | 1.744021000  |
| B  | 1.629667000  | 0.011661000  | 1.728659000  |
| B  | 0.843948000  | -1.390140000 | 1.761580000  |
| B  | -0.824009000 | -1.402039000 | 1.761493000  |
| B  | -1.629667000 | -0.011661000 | 1.728659000  |
| B  | -0.843948000 | 1.390140000  | 1.761580000  |
| B  | 0.824009000  | 1.402039000  | 1.761493000  |
| Cd | -0.010491000 | 1.377105000  | -0.637665000 |
| Cd | 0.010491000  | -1.377105000 | -0.637665000 |

B<sub>7</sub>Cd<sub>2</sub><sup>-</sup> 11.3 kcal·mol<sup>-1</sup>

|    |              |              |              |
|----|--------------|--------------|--------------|
| B  | 0.147371000  | 3.148372000  | -0.774589000 |
| B  | 0.015918000  | 0.432217000  | -1.496524000 |
| B  | 0.089289000  | 1.945861000  | -1.748828000 |
| B  | 0.072067000  | 1.611150000  | 0.000000000  |
| B  | 0.147371000  | 3.148372000  | 0.774589000  |
| B  | 0.015918000  | 0.432217000  | 1.496524000  |
| B  | 0.089289000  | 1.945861000  | 1.748828000  |
| Cd | 1.426130000  | -0.723929000 | 0.000000000  |
| Cd | -1.485363000 | -0.596307000 | 0.000000000  |

B<sub>7</sub>Cd<sub>2</sub><sup>-</sup> 5.1 kcal·mol<sup>-1</sup>

|    |              |              |              |
|----|--------------|--------------|--------------|
| B  | 2.298926000  | 1.328296000  | -0.005058000 |
| B  | -1.597897000 | 2.673527000  | -0.335627000 |
| B  | 0.803019000  | 1.641340000  | 0.660594000  |
| B  | 0.008331000  | 2.905550000  | -0.230435000 |
| B  | -0.792499000 | 1.644983000  | 0.660537000  |
| B  | 1.613452000  | 2.665600000  | -0.335577000 |
| B  | -2.290194000 | 1.339943000  | -0.004446000 |
| Cd | 1.399262000  | -0.742673000 | -0.021332000 |
| Cd | -1.403755000 | -0.736414000 | -0.021376000 |

B<sub>7</sub>Cd<sub>2</sub><sup>-</sup> 6.1 kcal·mol<sup>-1</sup>

|    |             |              |              |
|----|-------------|--------------|--------------|
| B  | 0.000000000 | 2.436985000  | 0.918112000  |
| B  | 0.000000000 | -1.591515000 | 2.182035000  |
| B  | 0.000000000 | 0.801671000  | 0.707179000  |
| B  | 0.000000000 | 0.000000000  | 2.281237000  |
| B  | 0.000000000 | -0.801671000 | 0.707179000  |
| B  | 0.000000000 | 1.591515000  | 2.182035000  |
| B  | 0.000000000 | -2.436985000 | 0.918112000  |
| Cd | 0.000000000 | 4.160444000  | -0.517485000 |
| Cd | 0.000000000 | -4.160444000 | -0.517485000 |

B<sub>7</sub>Cd<sub>2</sub><sup>-</sup> 54.8 kcal·mol<sup>-1</sup>

|    |              |              |              |
|----|--------------|--------------|--------------|
| B  | 1.679160000  | 0.808641000  | 0.000000000  |
| B  | -1.162015000 | -1.457120000 | 0.000000000  |
| B  | 0.414718000  | -1.816999000 | 0.000000000  |
| B  | -1.162015000 | 1.457120000  | 0.000000000  |
| B  | -1.863727000 | 0.000000000  | 0.000000000  |
| B  | 1.679160000  | -0.808641000 | 0.000000000  |
| B  | 0.414718000  | 1.816999000  | 0.000000000  |
| Cd | 0.000000000  | 0.000000000  | 1.520747000  |
| Cd | 0.000000000  | 0.000000000  | -1.520747000 |

$B_7Hg_2^-$  0.0 kcal·mol<sup>-1</sup>

|    |              |              |              |
|----|--------------|--------------|--------------|
| B  | 0.000000000  | 0.000000000  | 1.968547000  |
| B  | -1.632252000 | -0.005909000 | 2.039134000  |
| B  | -0.848765000 | 1.384157000  | 2.064078000  |
| B  | 0.837990000  | 1.390573000  | 2.064345000  |
| B  | 1.632252000  | 0.005909000  | 2.039134000  |
| B  | 0.848765000  | -1.384157000 | 2.064078000  |
| B  | -0.837990000 | -1.390573000 | 2.064345000  |
| Hg | 0.000015000  | -1.456311000 | -0.447079000 |
| Hg | -0.000015000 | 1.456311000  | -0.447079000 |

$B_7Hg_2^-$  16.4 kcal·mol<sup>-1</sup>

|    |              |              |              |
|----|--------------|--------------|--------------|
| B  | 0.030760000  | 3.409286000  | 0.778585000  |
| B  | -0.005503000 | 0.703578000  | 1.470371000  |
| B  | 0.015545000  | 2.212126000  | 1.755410000  |
| B  | 0.009740000  | 1.878268000  | 0.000000000  |
| B  | 0.030760000  | 3.409286000  | -0.778585000 |
| B  | -0.005503000 | 0.703578000  | -1.470371000 |
| B  | 0.015545000  | 2.212126000  | -1.755410000 |
| Hg | -1.484024000 | -0.447051000 | 0.000000000  |
| Hg | 1.478331000  | -0.460973000 | 0.000000000  |

$B_7Hg_2^-$  7.4 kcal·mol<sup>-1</sup>

|    |              |              |              |
|----|--------------|--------------|--------------|
| B  | -0.007552000 | 1.540712000  | 2.252034000  |
| B  | 0.392714000  | 2.874866000  | -1.599257000 |
| B  | -0.727626000 | 1.974379000  | 0.795047000  |
| B  | 0.269053000  | 3.138933000  | 0.000000000  |
| B  | -0.727626000 | 1.974379000  | -0.795047000 |
| B  | 0.392714000  | 2.874866000  | 1.599257000  |
| B  | -0.007552000 | 1.540712000  | -2.252034000 |
| Hg | 0.012640000  | -0.497903000 | 1.399162000  |
| Hg | 0.012640000  | -0.497903000 | -1.399162000 |

$B_7Hg_2^-$  -2.0 kcal·mol<sup>-1</sup>

|   |             |              |             |
|---|-------------|--------------|-------------|
| B | 0.000000000 | -2.429724000 | 0.980849000 |
| B | 0.000000000 | 1.592279000  | 2.249132000 |
| B | 0.000000000 | -0.801989000 | 0.766410000 |
| B | 0.000000000 | 0.000000000  | 2.336562000 |
| B | 0.000000000 | 0.801989000  | 0.766410000 |
| B | 0.000000000 | -1.592279000 | 2.249132000 |

|    |             |              |              |
|----|-------------|--------------|--------------|
| B  | 0.000000000 | 2.429724000  | 0.980849000  |
| Hg | 0.000000000 | -4.230876000 | -0.322787000 |
| Hg | 0.000000000 | 4.230876000  | -0.322787000 |

B<sub>8</sub>Zn<sub>2</sub> 0.0 kcal·mol<sup>-1</sup>

|    |              |              |              |
|----|--------------|--------------|--------------|
| B  | -1.283641000 | 1.275380000  | 1.250475000  |
| B  | 1.476200000  | 1.320570000  | 0.980788000  |
| B  | -0.931223000 | 1.256006000  | -1.531780000 |
| B  | 0.601725000  | 1.255829000  | -1.682970000 |
| B  | 0.161471000  | 1.239138000  | 1.786981000  |
| B  | -0.011192000 | 1.422606000  | 0.001422000  |
| B  | -1.772339000 | 1.342383000  | -0.228592000 |
| B  | 1.672811000  | 1.353841000  | -0.568156000 |
| Zn | -1.178464000 | -0.879674000 | -0.000708000 |
| Zn | 1.192828000  | -0.864618000 | -0.000654000 |

B<sub>8</sub>Zn<sub>2</sub> 20.2 kcal·mol<sup>-1</sup>

|    |              |              |              |
|----|--------------|--------------|--------------|
| B  | -0.007684000 | 2.685984000  | 0.000000000  |
| B  | -0.000202000 | 0.975932000  | 0.000000000  |
| B  | 1.391619000  | 2.013100000  | 0.000000000  |
| B  | -0.788581000 | -0.739474000 | 0.000000000  |
| B  | 0.801703000  | -0.732424000 | 0.000000000  |
| B  | -1.401200000 | 2.001396000  | 0.000000000  |
| B  | 1.744140000  | 0.507976000  | 0.000000000  |
| B  | -1.741228000 | 0.493432000  | 0.000000000  |
| Zn | 0.000734000  | -0.202085000 | 2.149523000  |
| Zn | 0.000734000  | -0.202085000 | -2.149523000 |

B<sub>8</sub>Zn<sub>2</sub> 21.1 kcal·mol<sup>-1</sup>

|    |              |              |              |
|----|--------------|--------------|--------------|
| B  | -2.036396000 | 0.000000000  | 0.000000000  |
| B  | 0.000000000  | 2.036396000  | 0.000000000  |
| B  | 1.439949000  | -1.439949000 | 0.000000000  |
| B  | -1.439949000 | 1.439949000  | 0.000000000  |
| B  | 2.036396000  | 0.000000000  | 0.000000000  |
| B  | -1.439949000 | -1.439949000 | 0.000000000  |
| B  | 1.439949000  | 1.439949000  | 0.000000000  |
| B  | 0.000000000  | -2.036396000 | 0.000000000  |
| Zn | 0.000000000  | 0.000000000  | -1.194877000 |
| Zn | 0.000000000  | 0.000000000  | 1.194877000  |
| Zn | 0.000000000  | 0.000000000  | 1.194877000  |

B<sub>8</sub>Zn<sub>2</sub> 35.5 kcal·mol<sup>-1</sup>

|   |              |              |              |
|---|--------------|--------------|--------------|
| B | 0.000000000  | 0.000000000  | 0.865074000  |
| B | 0.000000000  | 1.575628000  | 0.000000000  |
| B | 0.000000000  | 0.000000000  | -0.865074000 |
| B | 0.000000000  | -1.575628000 | 0.000000000  |
| B | -1.364534000 | -0.787814000 | 0.000000000  |
| B | -1.364534000 | 0.787814000  | 0.000000000  |
| B | 1.364534000  | 0.787814000  | 0.000000000  |
| B | 1.364534000  | -0.787814000 | 0.000000000  |

|    |             |             |              |
|----|-------------|-------------|--------------|
| Zn | 0.000000000 | 0.000000000 | -3.010212000 |
| Zn | 0.000000000 | 0.000000000 | 3.010212000  |

B<sub>8</sub>Zn<sub>2</sub> 32.7 kcal·mol<sup>-1</sup>

|    |              |              |              |
|----|--------------|--------------|--------------|
| B  | -0.818879000 | 1.790278000  | -1.122975000 |
| B  | 0.000770000  | 0.714178000  | 0.000853000  |
| B  | -0.000489000 | 2.465976000  | -0.004685000 |
| B  | 0.397130000  | -0.935646000 | 0.673544000  |
| B  | 0.950860000  | 0.289425000  | 1.451317000  |
| B  | -0.947221000 | 0.278957000  | -1.448084000 |
| B  | 0.819621000  | 1.798511000  | 1.117239000  |
| B  | -0.392682000 | -0.940310000 | -0.661751000 |
| Zn | -2.492467000 | -0.454438000 | 0.170589000  |
| Zn | 2.490949000  | -0.455790000 | -0.171499000 |

B<sub>8</sub>Cd<sub>2</sub> 0.0 kcal·mol<sup>-1</sup>

|    |              |              |              |
|----|--------------|--------------|--------------|
| B  | -1.264529000 | 1.685657000  | 1.275291000  |
| B  | 1.486968000  | 1.721082000  | 0.964449000  |
| B  | -0.952050000 | 1.681079000  | -1.522204000 |
| B  | 0.574765000  | 1.677940000  | -1.695375000 |
| B  | 0.185170000  | 1.654627000  | 1.790479000  |
| B  | -0.011631000 | 1.761622000  | 0.002811000  |
| B  | -1.774972000 | 1.737906000  | -0.201908000 |
| B  | 1.661938000  | 1.746961000  | -0.593498000 |
| Cd | -1.349895000 | -0.718393000 | -0.001057000 |
| Cd | 1.359722000  | -0.705240000 | -0.001031000 |

B<sub>8</sub>Cd<sub>2</sub> 17.4 kcal·mol<sup>-1</sup>

|    |              |              |              |
|----|--------------|--------------|--------------|
| B  | -0.007650000 | 2.722863000  | 0.000000000  |
| B  | -0.000007000 | 1.006411000  | 0.000000000  |
| B  | 1.393866000  | 2.057852000  | 0.000000000  |
| B  | -0.791654000 | -0.678729000 | 0.000000000  |
| B  | 0.805573000  | -0.671774000 | 0.000000000  |
| B  | -1.403331000 | 2.046066000  | 0.000000000  |
| B  | 1.754218000  | 0.562338000  | 0.000000000  |
| B  | -1.751038000 | 0.547581000  | 0.000000000  |
| Cd | 0.000029000  | -0.395428000 | 2.406463000  |
| Cd | 0.000029000  | -0.395428000 | -2.406463000 |

B<sub>8</sub>Cd<sub>2</sub> 45.8 kcal·mol<sup>-1</sup>

|    |              |              |              |
|----|--------------|--------------|--------------|
| B  | -1.457286000 | 1.457286000  | 0.000000000  |
| B  | 1.457286000  | 1.457286000  | 0.000000000  |
| B  | 0.000000000  | -2.060914000 | 0.000000000  |
| B  | 0.000000000  | 2.060914000  | 0.000000000  |
| B  | 1.457286000  | -1.457286000 | 0.000000000  |
| B  | -2.060914000 | 0.000000000  | 0.000000000  |
| B  | 2.060914000  | 0.000000000  | 0.000000000  |
| B  | -1.457286000 | -1.457286000 | 0.000000000  |
| Cd | 0.000000000  | 0.000000000  | -1.425556000 |
| Cd | 0.000000000  | 0.000000000  | 1.425556000  |



B<sub>8</sub>Cd<sub>2</sub> 24.1 kcal·mol<sup>-1</sup>

|    |              |              |              |
|----|--------------|--------------|--------------|
| B  | 0.000000000  | 0.000000000  | 0.864249000  |
| B  | 0.000000000  | 1.574569000  | 0.000000000  |
| B  | 0.000000000  | 0.000000000  | -0.864249000 |
| B  | 0.000000000  | -1.574569000 | 0.000000000  |
| B  | -1.363617000 | -0.787285000 | 0.000000000  |
| B  | -1.363617000 | 0.787285000  | 0.000000000  |
| B  | 1.363617000  | 0.787285000  | 0.000000000  |
| B  | 1.363617000  | -0.787285000 | 0.000000000  |
| Cd | 0.000000000  | 0.000000000  | -3.170539000 |
| Cd | 0.000000000  | 0.000000000  | 3.170539000  |

B<sub>8</sub>Cd<sub>2</sub> 26.2 kcal·mol<sup>-1</sup>

|    |              |              |              |
|----|--------------|--------------|--------------|
| B  | 0.009925000  | 2.685893000  | 0.013274000  |
| B  | 0.000140000  | 0.933566000  | 0.000068000  |
| B  | -0.769289000 | 2.029776000  | -1.141859000 |
| B  | 0.387152000  | -0.725003000 | 0.656921000  |
| B  | -0.402205000 | -0.710721000 | -0.682243000 |
| B  | 0.780697000  | 2.003951000  | 1.159392000  |
| B  | -0.912208000 | 0.521880000  | -1.479936000 |
| B  | 0.907988000  | 0.489567000  | 1.474866000  |
| Cd | 2.751802000  | -0.376586000 | -0.094686000 |
| Cd | -2.752031000 | -0.376425000 | 0.094636000  |

B<sub>8</sub>Hg<sub>2</sub> 0.0 kcal·mol<sup>-1</sup>

|    |              |              |              |
|----|--------------|--------------|--------------|
| B  | 1.231117000  | 1.997210000  | -1.298701000 |
| B  | -1.505708000 | 1.999192000  | -0.947542000 |
| B  | 0.957743000  | 1.986813000  | 1.521833000  |
| B  | -0.558085000 | 1.978786000  | 1.715915000  |
| B  | -0.218323000 | 1.978505000  | -1.793044000 |
| B  | 0.001342000  | 2.024562000  | 0.000792000  |
| B  | 1.765862000  | 1.987017000  | 0.182158000  |
| B  | -1.661027000 | 1.993737000  | 0.626516000  |
| Hg | 1.408137000  | -0.498783000 | -0.000253000 |
| Hg | -1.408945000 | -0.497831000 | -0.000242000 |

B<sub>8</sub>Hg<sub>2</sub> 84.4 kcal·mol<sup>-1</sup>

|    |              |              |              |
|----|--------------|--------------|--------------|
| B  | -1.467443000 | 1.467443000  | 0.000000000  |
| B  | 1.467443000  | 1.467443000  | 0.000000000  |
| B  | 0.000000000  | -2.075277000 | 0.000000000  |
| B  | 0.000000000  | 2.075277000  | 0.000000000  |
| B  | 1.467443000  | -1.467443000 | 0.000000000  |
| B  | -2.075277000 | 0.000000000  | 0.000000000  |
| B  | 2.075277000  | 0.000000000  | 0.000000000  |
| B  | -1.467443000 | -1.467443000 | 0.000000000  |
| Hg | 0.000000000  | 0.000000000  | -1.442420000 |
| Hg | 0.000000000  | 0.000000000  | 1.442420000  |

B<sub>8</sub>Hg<sub>2</sub> 2.0 kcal·mol<sup>-1</sup>

|    |              |              |              |
|----|--------------|--------------|--------------|
| B  | 0.000000000  | 0.000000000  | 0.862296000  |
| B  | 0.000000000  | 1.573301000  | 0.000000000  |
| B  | 0.000000000  | 0.000000000  | -0.862296000 |
| B  | 0.000000000  | -1.573301000 | 0.000000000  |
| B  | -1.362518000 | -0.786650000 | 0.000000000  |
| B  | -1.362518000 | 0.786650000  | 0.000000000  |
| B  | 1.362518000  | 0.786650000  | 0.000000000  |
| B  | 1.362518000  | -0.786650000 | 0.000000000  |
| Hg | 0.000000000  | 0.000000000  | -3.123224000 |
| Hg | 0.000000000  | 0.000000000  | 3.123224000  |

B<sub>8</sub>Hg<sub>2</sub> 19.1 kcal·mol<sup>-1</sup>

|    |              |              |              |
|----|--------------|--------------|--------------|
| B  | 0.000000000  | 0.000000000  | 3.664947000  |
| B  | 0.000000000  | 0.000000000  | 1.896161000  |
| B  | -1.261216000 | -0.591603000 | 2.990910000  |
| B  | 0.633246000  | 0.471654000  | 0.255159000  |
| B  | -0.633246000 | -0.471654000 | 0.255159000  |
| B  | 1.261216000  | 0.591603000  | 2.990910000  |
| B  | -1.567839000 | -0.742211000 | 1.476858000  |
| B  | 1.567839000  | 0.742211000  | 1.476858000  |
| Hg | -0.050393000 | 2.735033000  | -0.468782000 |
| Hg | 0.050393000  | -2.735033000 | -0.468782000 |
